# Supplementary material for: An All-in-One Biomimetic 2D Spiking Neural Network
Source: Research Square preprint supplement (doi:10.21203/rs.3.rs-249741/v1), 2021-02-19
Supplement: Supplementary file 1 [file f173510f679998160951b25e.pdf]

## Supplementary Information

### An All-in-One Biomimetic 2D Spiking Neural Network

*Shiva Subbulakshmi Radhakrishnan<sup>1</sup>, Akhil Dodda<sup>1</sup>, and Saptarshi Das<sup>1,2,3,\*</sup>*

*<sup>1</sup>Department of Engineering Science and Mechanics, Pennsylvania State University, University Park, PA 16802, USA*

*<sup>2</sup>Department of Materials Science and Engineering, Pennsylvania State University, University Park, PA 16802, USA*

*<sup>3</sup>Materials Research Institute, Pennsylvania State University, University Park, PA 16802, USA*

## Supplementary Information 1

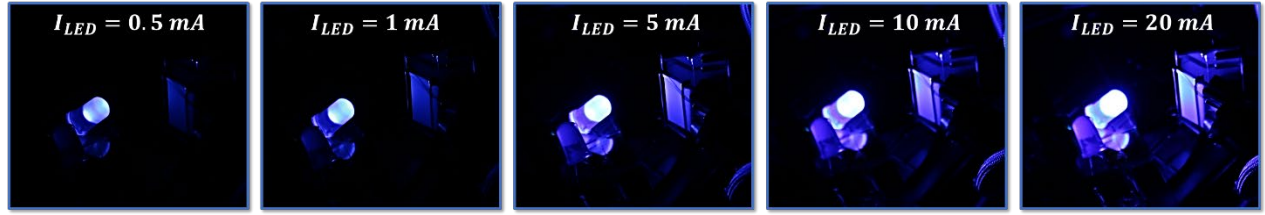

**Figure S1:** Optical images showing different LED brightness levels for various  $I_{LED}$ .

## Supplementary Information 2

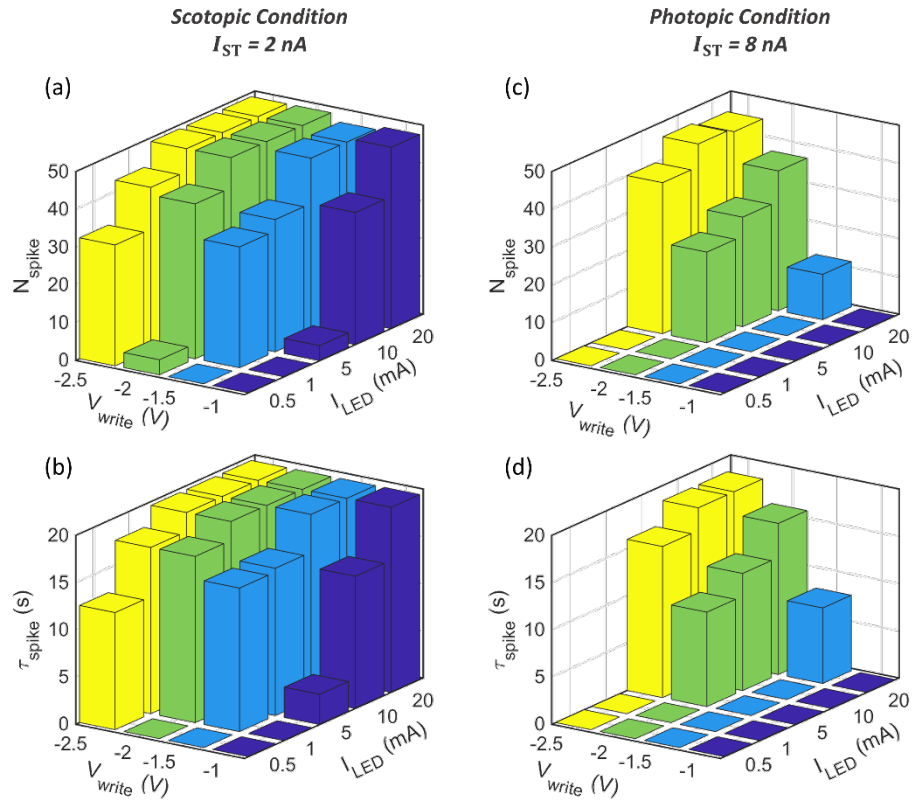

**Figure S2:** a) Number of spikes ( $N_{spike}$ ) and b) total spiking duration ( $\tau_{spike}$ ) as a function of  $I_{LED}$  and  $V_{write}$ , with  $I_{ST} = 2 \text{ nA}$ . Decreasing the spiking threshold and illuminating the LED at  $V_{write} = -2.5 \text{ V}$  allow encoding under scotopic (low-light) conditions. c) Number of spikes ( $N_{spike}$ ) and d) total spiking duration ( $\tau_{spike}$ ) as a function of  $I_{LED}$  and  $V_{write}$ , with  $I_{ST} = 8 \text{ nA}$ . Increasing the spiking threshold and illuminating the LED at  $V_{write} = -2 \text{ V}$  allow encoding under photopic (bright-light) conditions.

### Supplementary Information 3

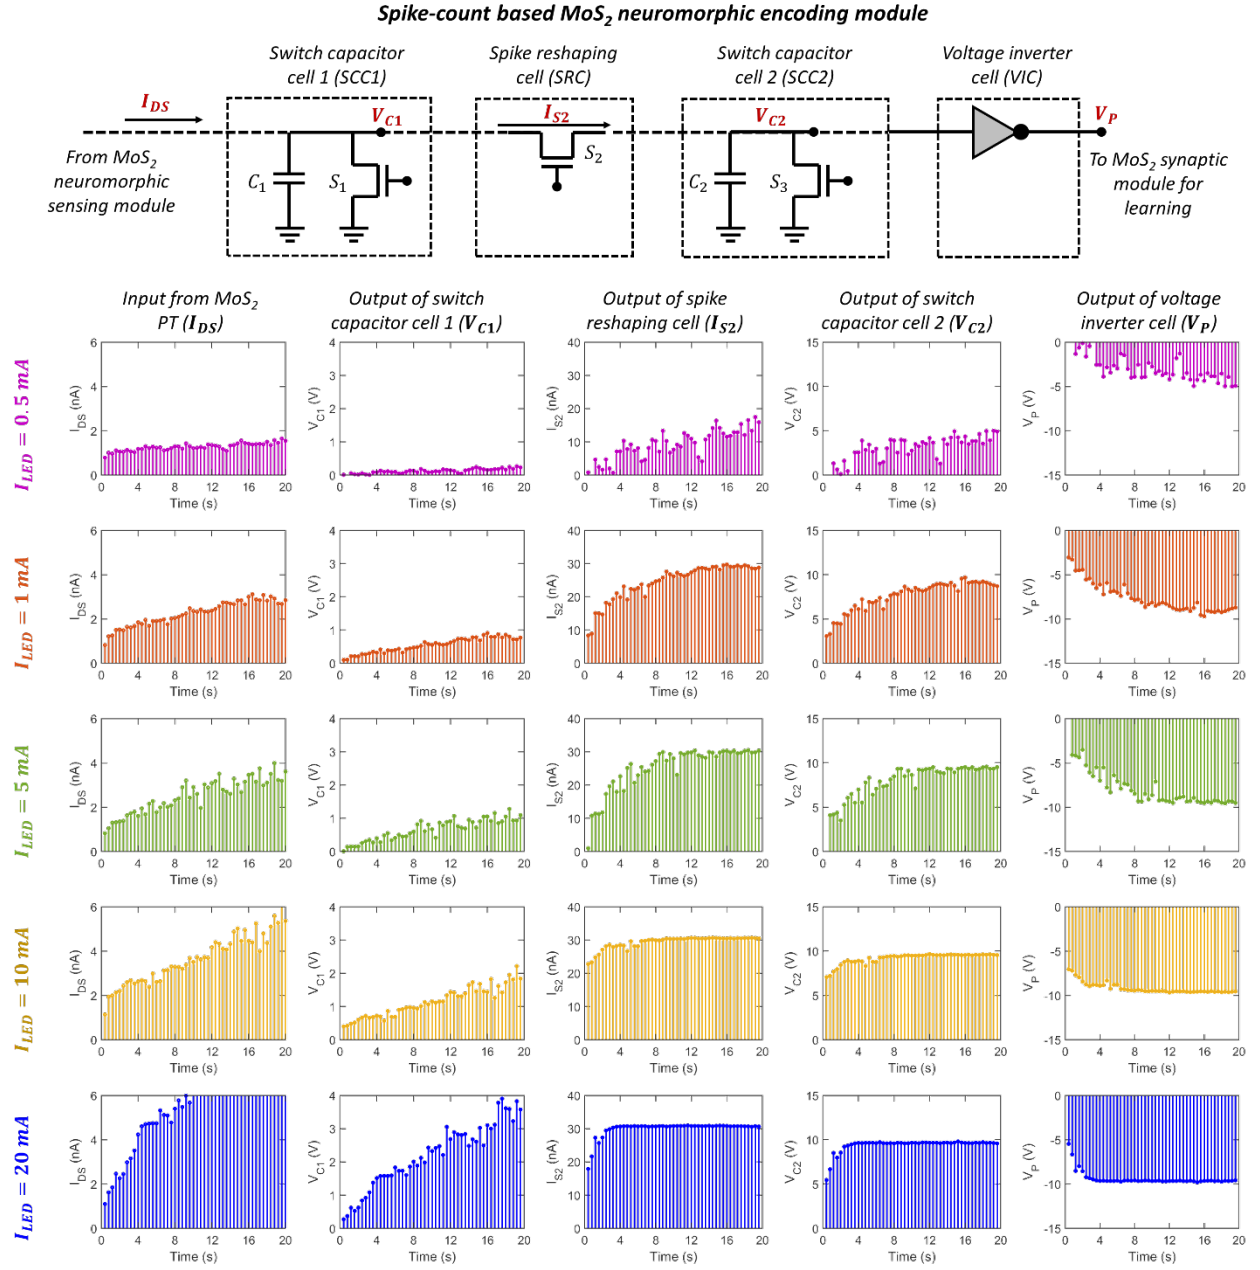

**Figure S3:**  $I_{DS}$  spikes obtained from the MoS<sub>2</sub> PT biased at  $V_{write} = -1.5$  V for different  $I_{LED}$ , and corresponding output of SCC1 ( $V_{C1}$ ), SRC ( $I_{S2}$ ), SCC2 ( $V_{C2}$ ), and VIC ( $V_P$ ).

### Supplementary Information 4

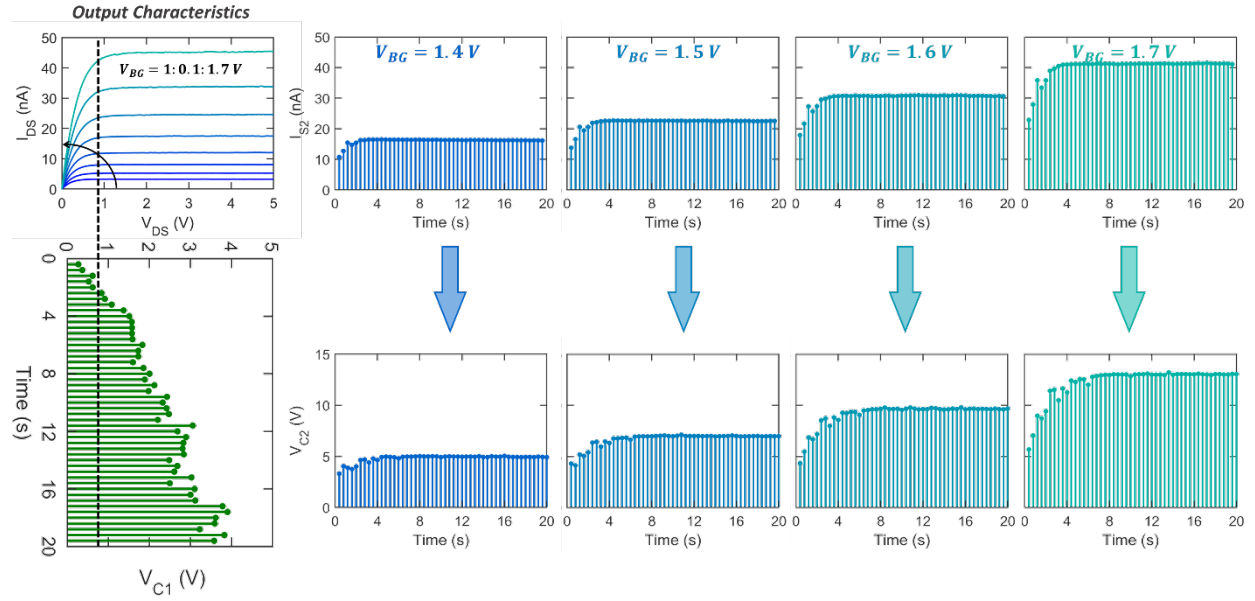

**Figure S4:** Output characteristics of MoS<sub>2</sub> FET (S<sub>2</sub>) illustrating current saturation for  $V_{C1} > 0.8$  V, which corresponds to  $I_{DS} = I_{ST} = 3$  nA. Depending upon the gate-bias of S<sub>2</sub>, different magnitudes of  $I_{S2}$  spikes and subsequently,  $V_{C2}$  spikes can be obtained for the same set of  $V_{C1}$  spikes.

## Supplementary Information 5

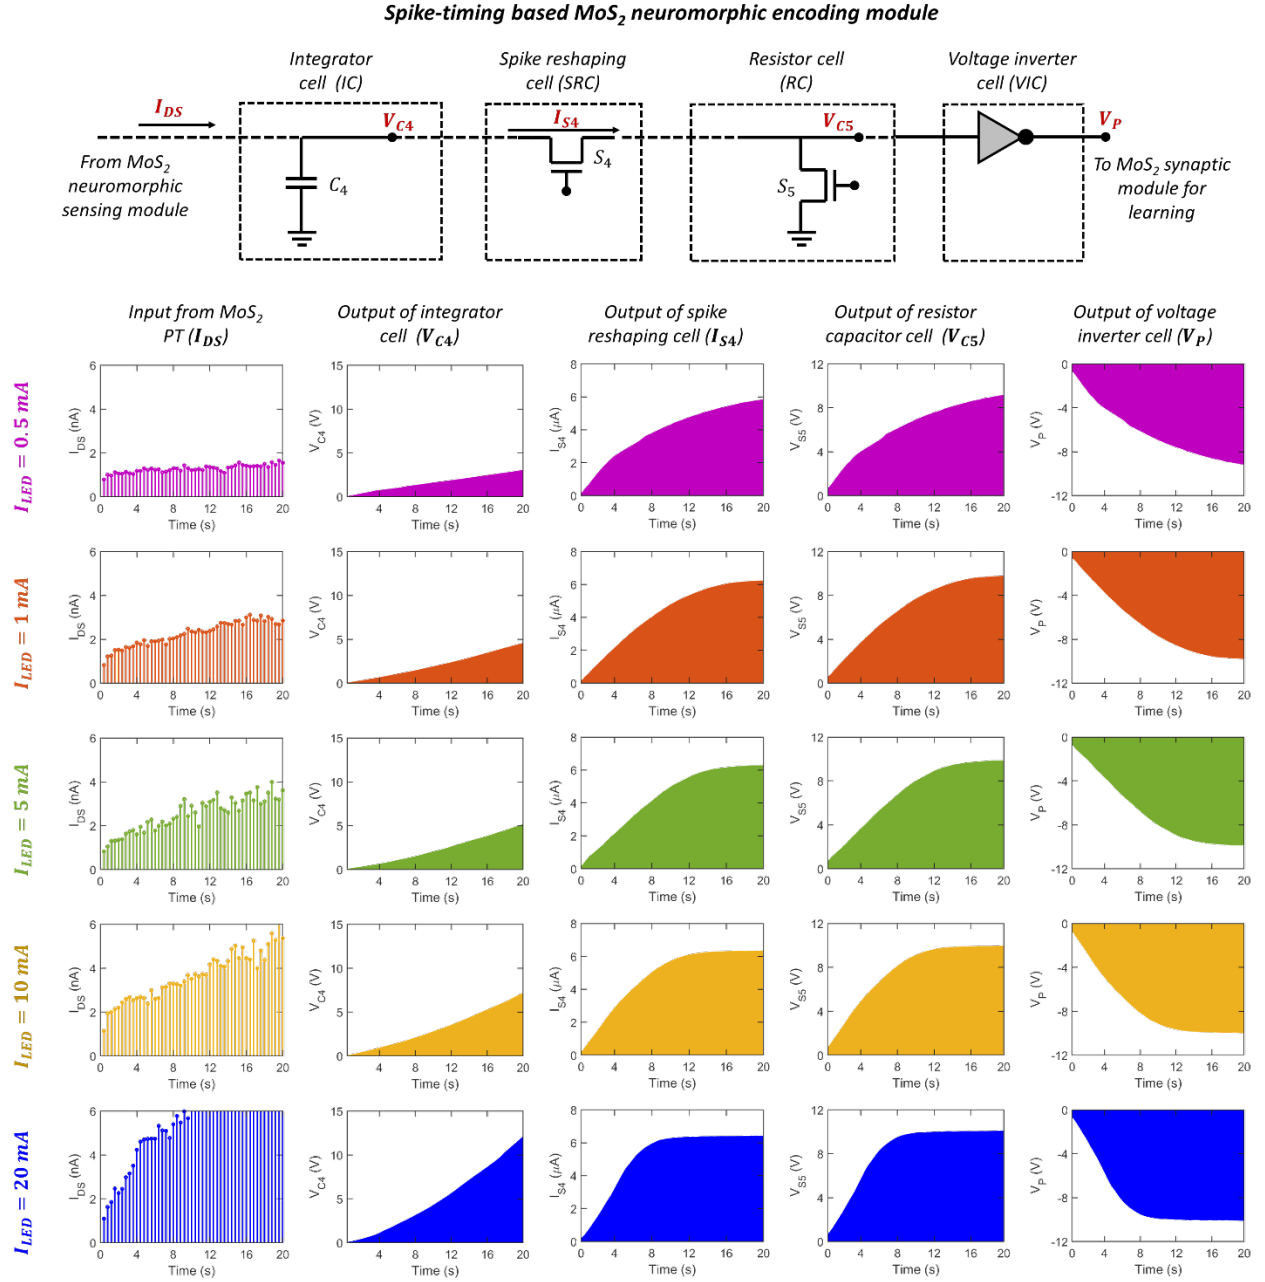

**Figure S5:**  $I_{DS}$  spikes obtained from the MoS<sub>2</sub> PT biased at  $V_{write} = -1.5\text{ V}$  for different  $I_{LED}$ , and corresponding output of  $V_{C4}$ ,  $I_{S4}$ ,  $V_{C5}$ , and  $V_P$ .

## Supplementary Information 6

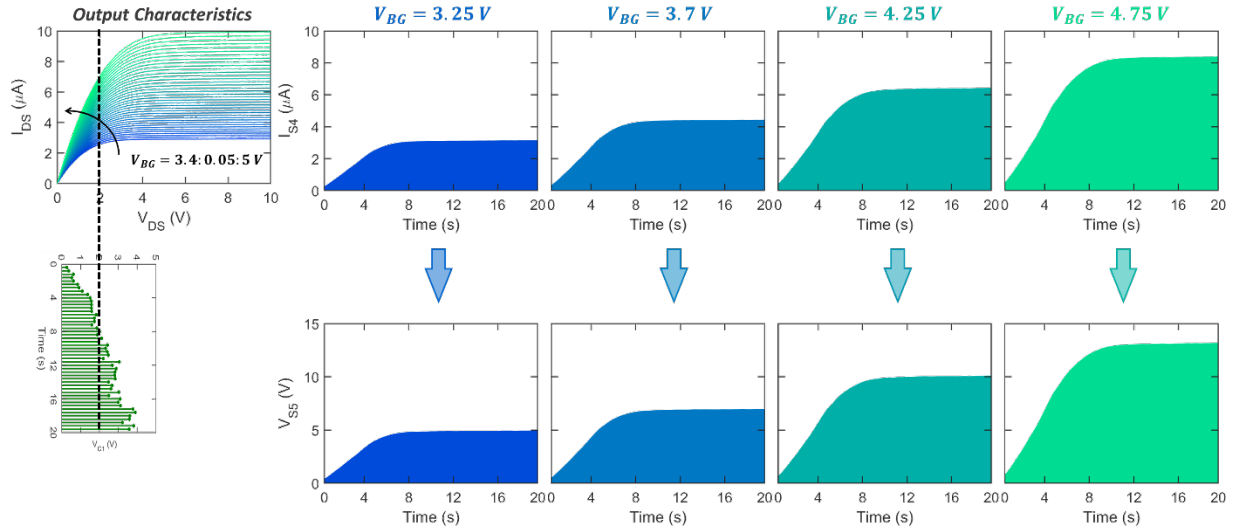

**Figure S6:** Output characteristics of  $S_4$  illustrating current saturation for  $V_{C4} > 1.5$  V, which corresponds to  $I_{DS} = I_{ST} = 3$  nA. Depending upon the biasing conditions of the  $S_4$ , different magnitudes of  $I_{S4}$  spikes and subsequently,  $V_{S5}$  spikes can be obtained for the same set of  $V_{C1}$  spikes.

## Supplementary Information 7

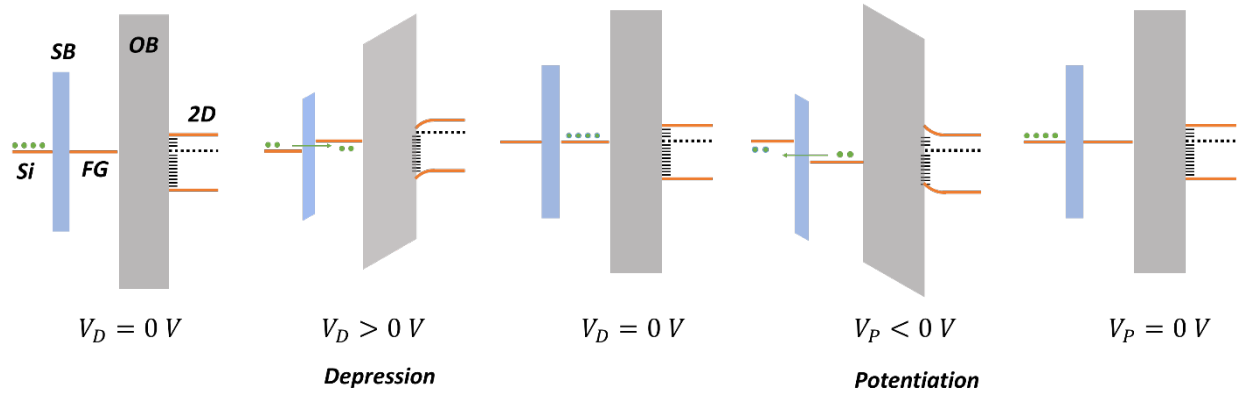

**Figure S7:** Energy band diagrams showing the potentiation and depression operations. The  $p^{++}$ -Si/TiN/Pt interface in the stack is characterized by a Schottky barrier (SB), whereas, the gate dielectric, i.e. 50 nm  $Al_2O_3$ , acts as an oxide barrier (OB). The OB is much wider and taller compared to the SB. When programming voltage spikes are applied to the control gate (CG), i.e.  $p^{++}$ -Si, carriers tunnel from the  $p^{++}$ -Si into the Pt/TiN floating gate (FG) and remains trapped even after the release of the spike. These trapped charges on the FG screen the electric field from CG and thereby shifts the  $V_{TH}$ . The total amount of charge injected into the FG, and hence shift in  $V_{TH}$  of the  $MoS_2$  FET can be controlled by the amplitude, duration, and polarity of  $V_{P/D}$ .

## Supplementary Information 8

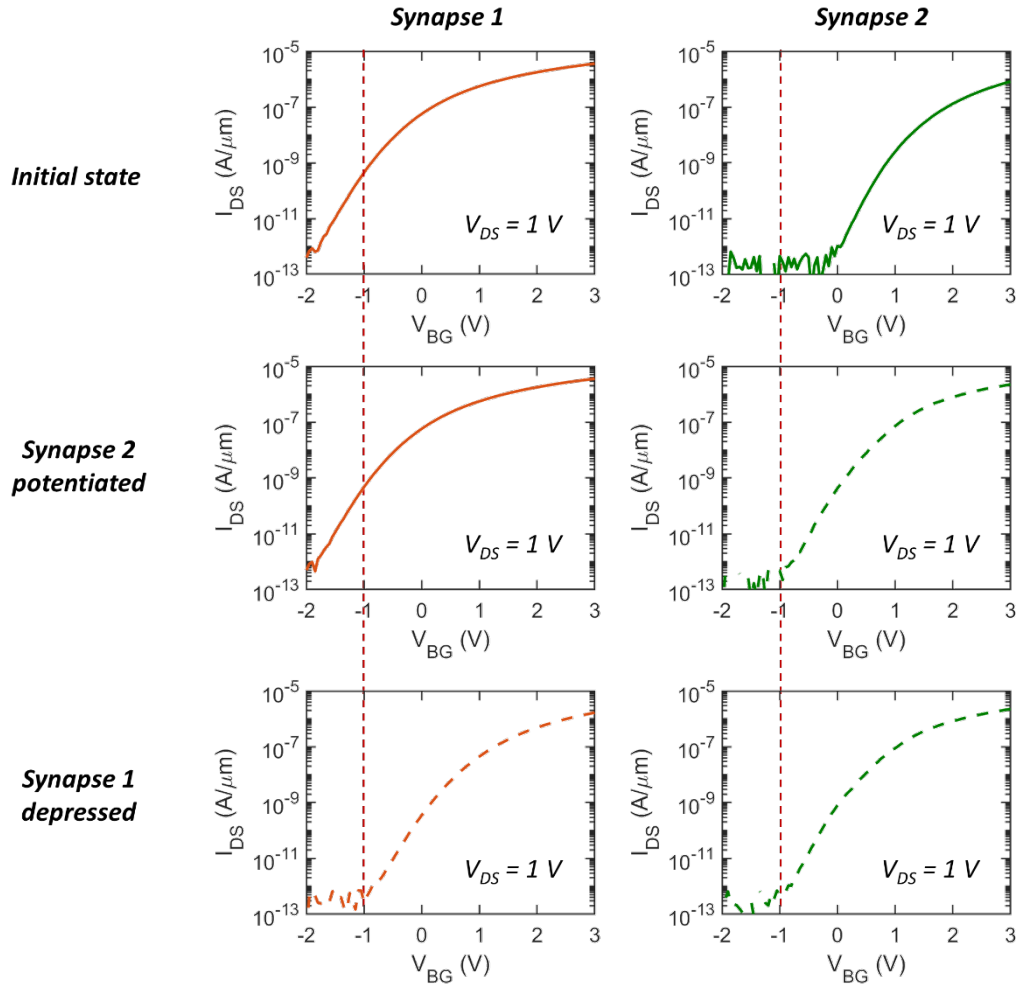

**Figure S8:** Transfer characteristics of 2 adjacent MoS<sub>2</sub> synapses subjected to local potentiation and depression. When synapse 2 is potentiated, synapse 1 remains unaltered. Similarly, when synapse 1 is depressed synapse 2 retains its potentiated state. This proves that, despite of global back-gate, synapses can be potentiated or depressed locally.

**Supplementary Information 9**

**Table 1:** Energy expenditure during the spike-count and spike-timing based unsupervised learning, forgetting, and relearning using MoS<sub>2</sub> synapses under various conditions of potentiation and depression.

|                                          | Spike-count based<br>unsupervised Learning | Spike-timing based<br>unsupervised Learning |
|------------------------------------------|--------------------------------------------|---------------------------------------------|
| Weak Potentiation<br>Strong Depression   | 10.2 nJ                                    | 0.97 nJ                                     |
| Strong Potentiation<br>Weak Depression   | 9.6 nJ                                     | 0.97 nJ                                     |
| Strong Potentiation<br>Strong Depression | 9.7 nJ                                     | 0.97 nJ                                     |
